# Supplementary material for: Conservative site-specific and single-copy transgenesis in human LINE-1 elements
Source: PubMed Central journal article supplement — Nucleic Acids Res. 2015 Dec 15;44(6):e55. doi: 10.1093/nar/gkv1345 (PMC4824084; doi:10.1093/nar/gkv1345), 2015-12-15
Supplement: supp_gkv1345_nar-02077-met-g-2015-File008.pdf [file supp_gkv1345_nar-02077-met-g-2015-File008.pdf]

**Supplementary Figure S1. Inverse PCR for identification of endogenous targets in HT1080.**

**a.**

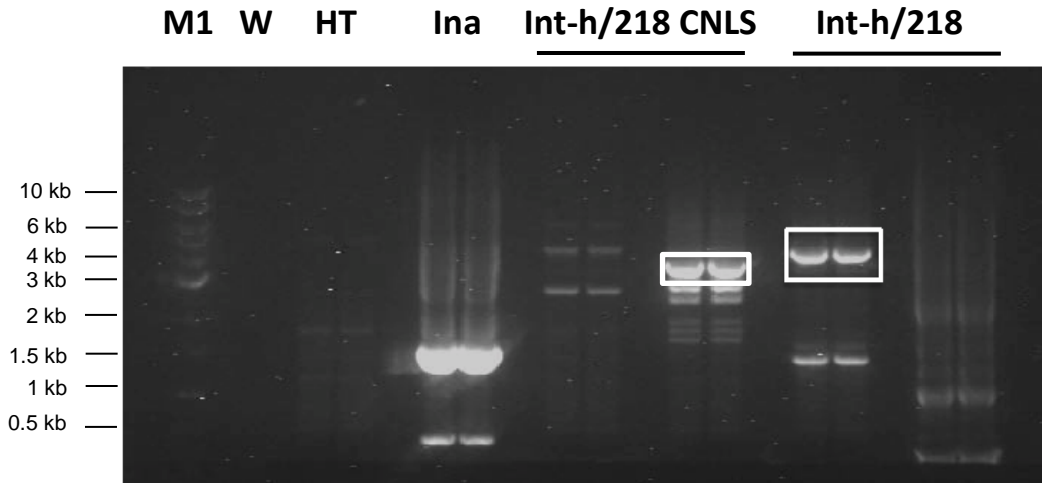

**b.**

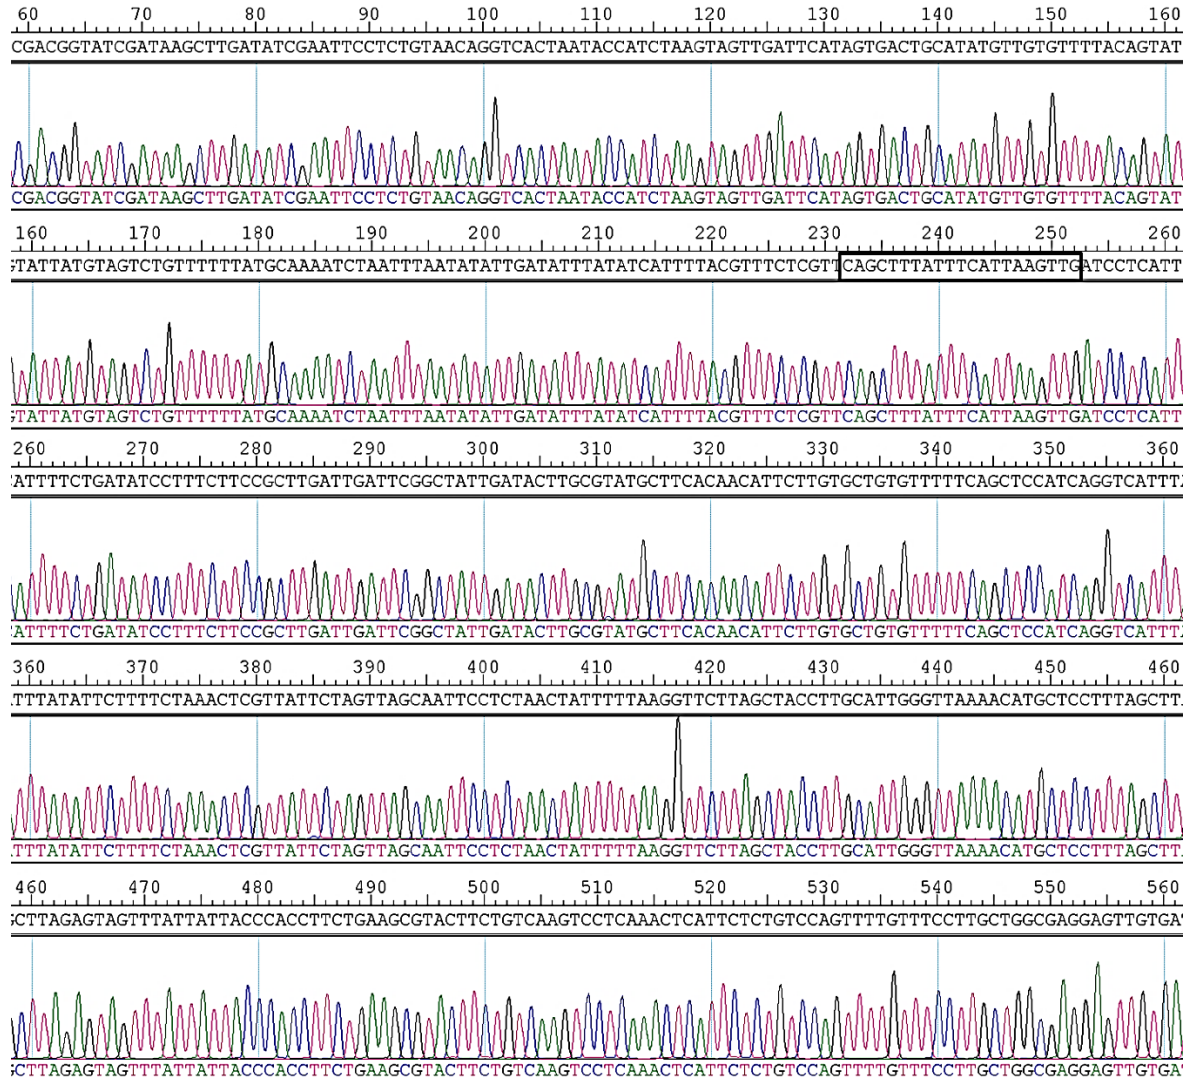

**Supplementary Figure S1. Inverse PCR for identification of endogenous targets in HT1080.** (a) Inverse PCR and corresponding nested PCRs were performed using genomic DNA from pooled puromycin-resistant HT1080 colonies obtained through transfections as described in Materials and Methods. PCR amplified products that were larger than 3kb (fragments marked in white boxes) were extracted and sequenced. W, no DNA template control; HT, negative control (genomic DNA template from parental HT1080 cells); Ina, genomic DNA template from puromycin resistant colonies obtained through co-transfection of *pattP4X-PGKssPuro* and *pCMVssIna*, the latter expressed inactive Int as negative control; Int-h/218CNLS, genomic DNA template from puromycin resistant colonies obtained through co-transfection of *pattP4X-PGKssPuro* and *pCMVssInt-h/218CNLS*; Int-h/218, genomic DNA template from puromycin resistant colonies obtained through co-transfection of *pattP4X-PGKssPuro* and *pCMVssInt-h/218*; M1, 1kb DNA ladder. (b) Sequencing analysis of the PCR product obtained in the inverse PCR with genomic DNA template from puromycin resistant colonies obtained through co-transfection of *pattP4X-PGKssPuro* and *pCMVssInt-h/218*. *attR* site (P-O-H') resulting from recombination of *attP4X* with the endogenous sequence is marked in the box. Sequencing analysis of the PCR product obtained in the inverse PCR with genomic DNA template from puromycin resistant colonies obtained through co-transfection of *pattP4X-PGKssPuro* and *pCMVssInt-h/218CNLS* revealed a random integration of the targeting vector into chromosome 6 (sequence not shown).

**Supplementary Figure S2. Western Blot analysis for pluripotency markers Oct-4, Nanog and Sox2 in the targeted hESC clones and differentiated derivatives.**

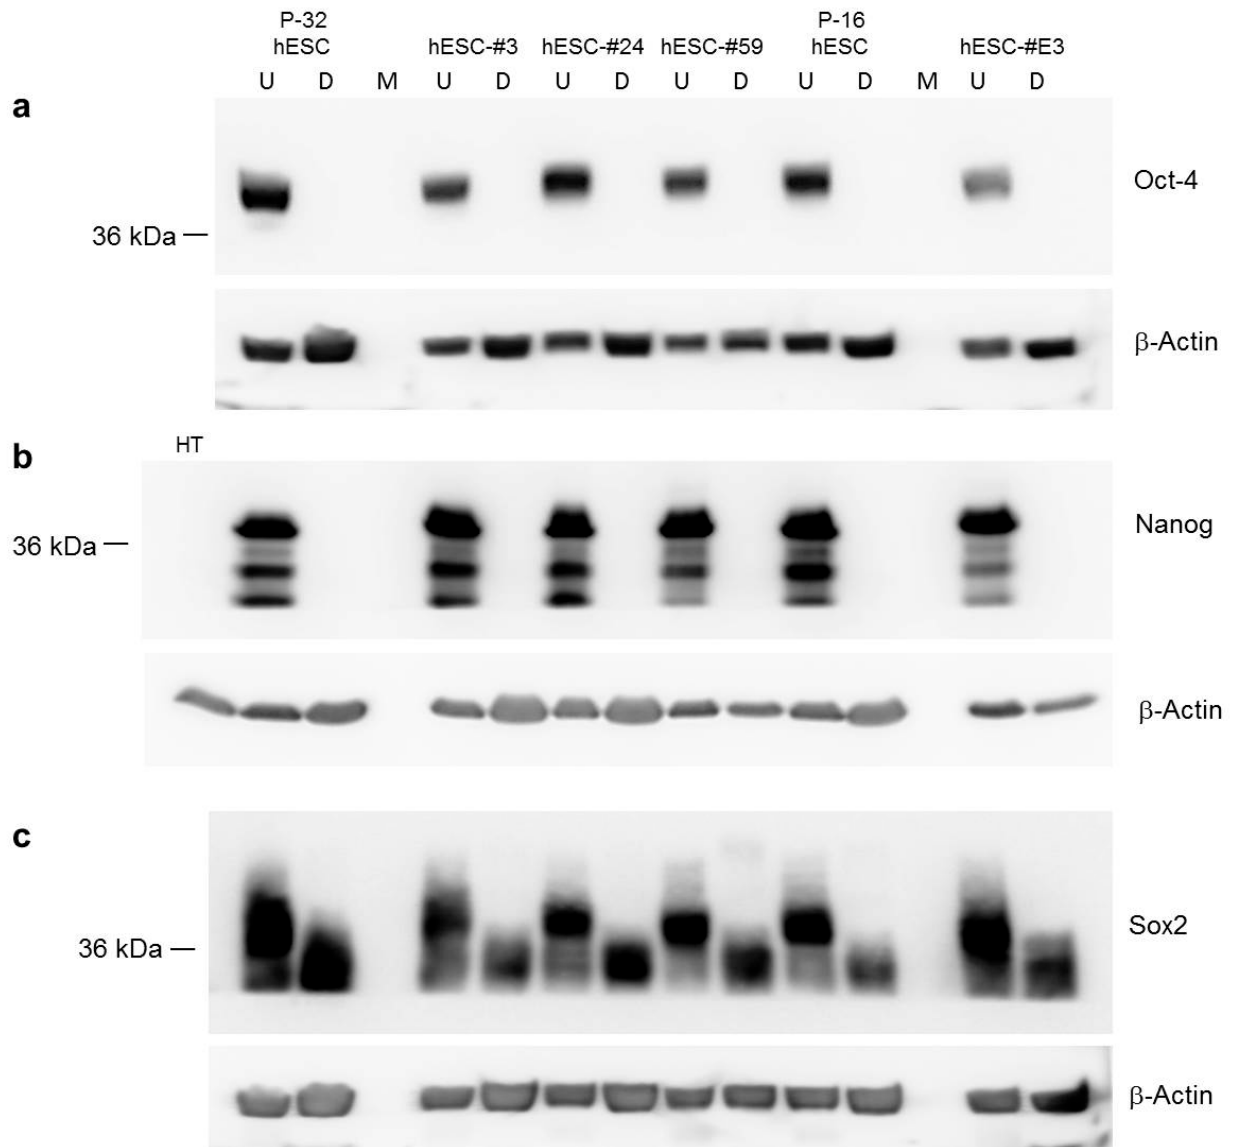

**Supplementary Figure S2. Western Blot analysis for pluripotency markers Oct-4, Nanog and Sox2 in the targeted hESC clones and differentiated derivatives.** Cell lysates from undifferentiated parental hESCs, the targeted clones (hESC#3, hESC#24, hESC#59 and hESC#E3) and their respective RA-induced differentiated derivatives were subjected to Western blot analysis and probed with antibodies against Oct-4, Nanog and Sox2 (top panels of a, b and c, respectively). Oct-4, Nanog and Sox2 expression was detected only in hESC clones.  $\beta$ -actin protein was used as loading control in each case (bottom panels of a, b and c). U, undifferentiated; D, differentiated; HT, cell lysate of HT1080 as control for differentiated cells; M, Marker lane; P-16, passage 16; P-32, passage 32.

**Supplementary Figure S3. Targeting the endogenous *attH4X* sequence with *attL4X/attR4X* in HT1080.**

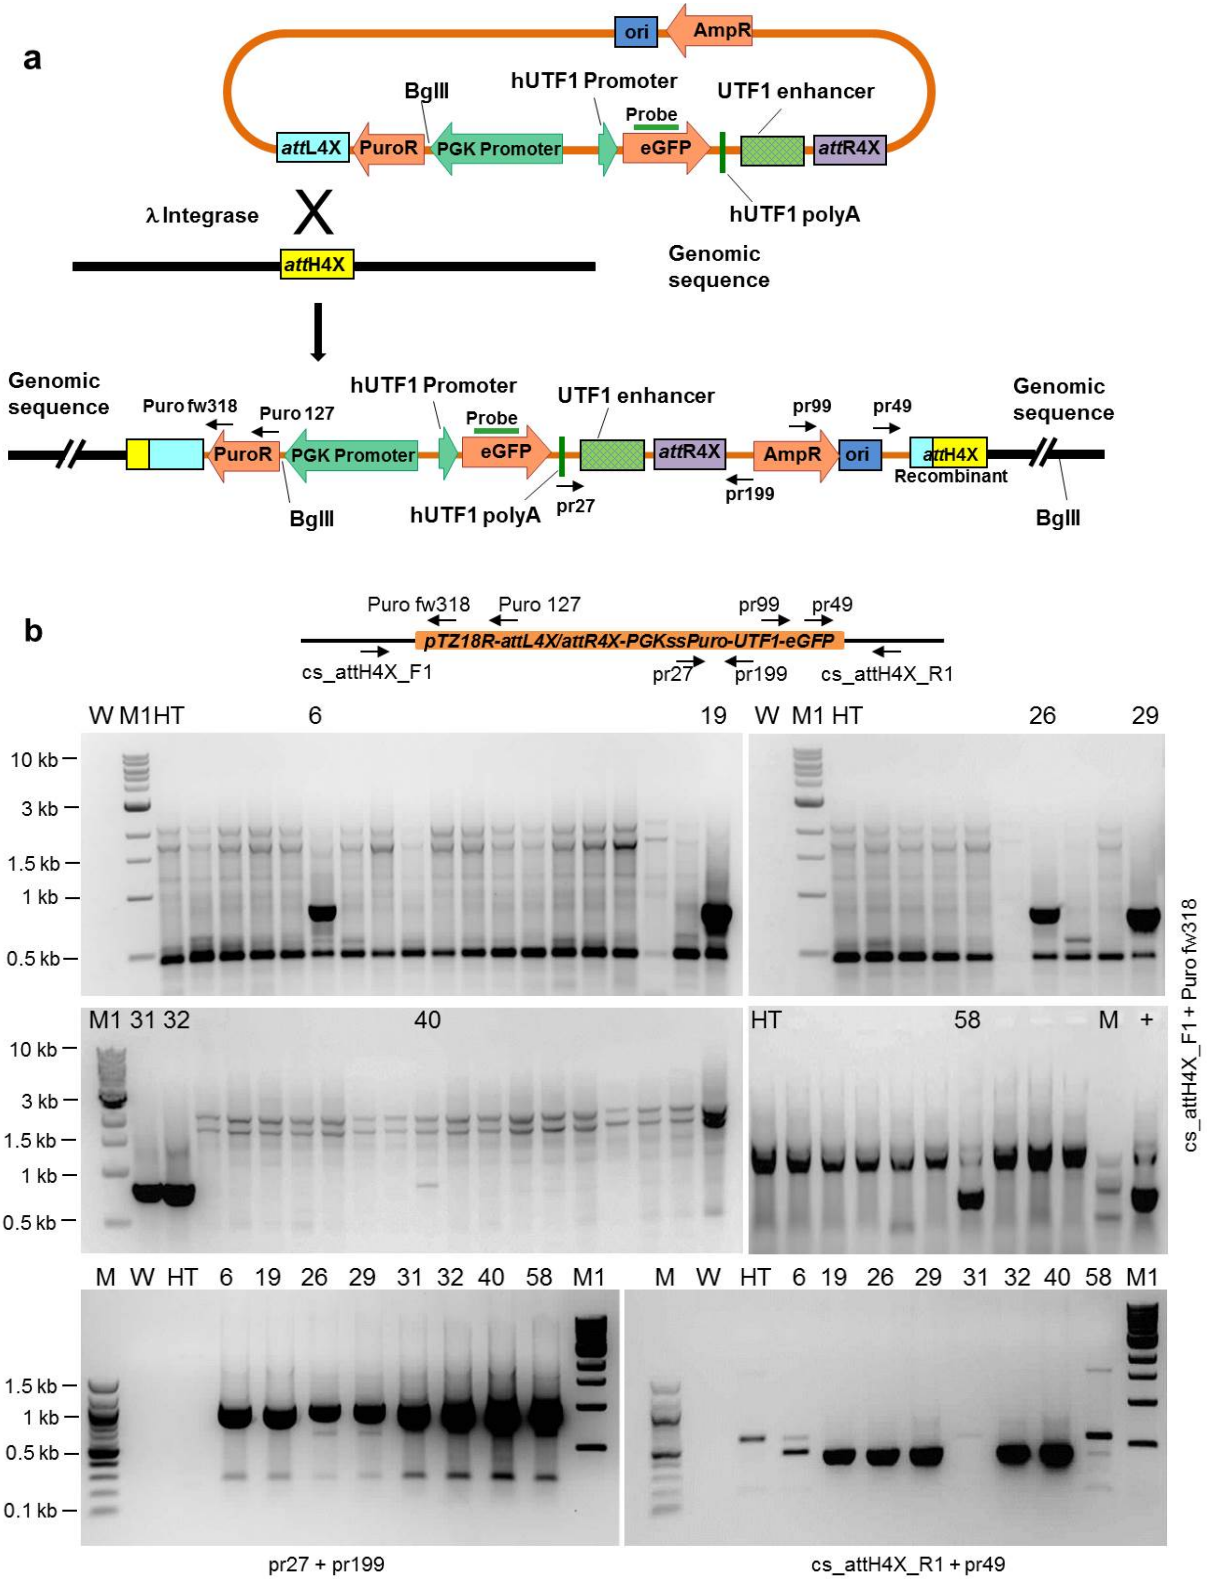

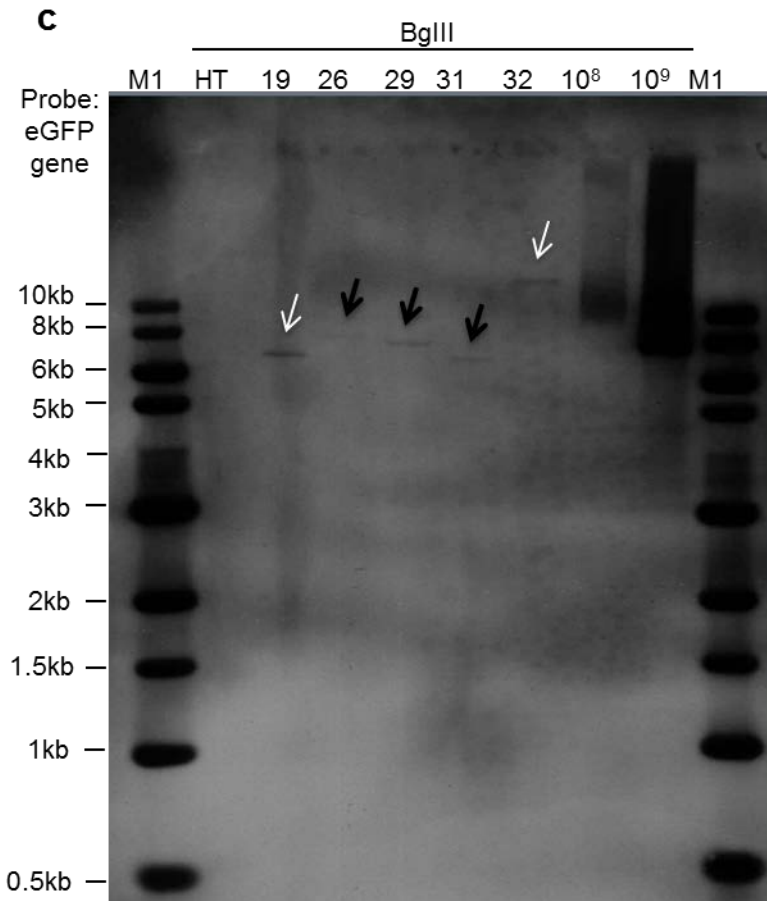

**Supplementary Figure S3. Targeting the endogenous *attH4X* sequence with *attL4X/attR4X* in HT1080.** (a) Schematic diagram of *pTZ18R-attL4X/attR4X-PGKssPuro-UTF1-EGFP* targeting vector after integration into *attH4X*. Relative binding positions of primers (Puro fw318, Puro rev127, pr27, pr199, pr99 and pr49) and the probe for eGFP are indicated. (b) Screening for *attL4X/attR4X* x *attH4X* recombination events. Eight clones positive for *attL4X* x *attH4X* recombination events at L1 loci were identified in an initial screen involving semi-nested PCR with primers *cs\_attH4X\_F1* and Puro rev127 using templates from a primary PCR (primers *cs\_attH4X\_F1* and Puro fw318). PCR-amplifications (~850 bp) were detected for clones (6, 19, 26, 29, 31, 32, 40, 58; top panel). PCR was performed to verify the presence of unrecombined *attR4X* in all 8 clones, using primers pr27 and pr199. PCR products (~1000bp) were detected in all (Bottom left panel). Recombinant *attH4X* junction (generated from *attL4X* x *attH4X*) recombination was screened by semi-nested PCR with primers *cs\_attH4X\_R1* and pr49 using samples from a primary PCR (primers *cs\_attH4X\_R1* and pr99 where). PCR products of expected size (~400 bp) were detected for clones 19, 26, 29, 32, 40 (Bottom right panel). W, no DNA template control; HT, negative control (genomic DNA from parental HT1080 cells); 1 kb DNA ladder. PCR products were verified by sequencing analysis. (c) Southern blot analysis. Genomic DNA purified from the five targeted HT1080 clones and parental HT1080 cells were subjected to digestion with *BgIII*. PCR-derived Digoxigenin-labelled probe to the eGFP gene was employed. Lanes: 1kb DNA ladder; HT1080, parental DNA; 19, 26, 29, 31, 32 genomic DNA from targeted HT1080 clones;

$10^8$ ,  $10^9$  copies of linearized targeting vector as positive control. White arrow heads indicate fragments of the expected size and black arrow heads indicate extra or unexpected fragments in the targeted clones.

**Supplementary Table 1. List of Primers (5'-3')**

|                           |                                                                      |
|---------------------------|----------------------------------------------------------------------|
| Int fwd PstI              | CCAACTGCAGCTCGAGGCCACCATGGGAAGAAGGCGAAG                              |
| Int_rev_XbaI              | GAGCTCTAGATCATTATTTGATTCA                                            |
| CNLS_xbaI_int             | GAGCTCTAGATTATCATACCTTTCTCTTCTTCTTAGGGCCGCCTCCGGATTTGATT<br>CAATTTTG |
| KpnI_UTF1_fwd             | GATTGGTACCTTAGGACCCGGCGGGCGGGG                                       |
| SDM-Int-Y342A-F           | CGGTCACCATGGCATCACAGGCTCGTGATGACAGAGGCAGGGA                          |
| SDM-Int-Y342A-R           | TCCCTGCCTCTGTCATCACGAGCCTGTGATGCCATGGTGACCG                          |
| attP(4X)_sdm (For)        | CGTTTCTCGTTCAGCTTTATTTTCATTAAGTTGGCATTATAAAAAAGC                     |
| attP(4X)_sdm (Rev)        | GCTTTTTTATAATGCCAACTTAATGAAATAAAGCTGAACGAGAAACG                      |
| INT-HIS-XbaI Rev          | TATCCGAGATCTCTAGATTAGTGGTGATGGTGATGATGTTTGATTTCAATTTTGTC<br>CA       |
| NLS-HIS-XbaI Rev          | TATCCGAGATCTCTAGATTAGTGGTGATGGTGATGATGTACCTTCTCTTCTTCTTA<br>GG       |
| EF1Fw_EcoRI               | ATCGCCGAATTCGGCTCCGGTGCCCGTCAGTGGGCAG                                |
| EF1Rev-NheI               | CGAATTGCTAGCTCACGACACCTGAAATGGAAGAA                                  |
| EF1aRe-NsiI               | GTGTATATGCATCCACCACACTGGACTAGTGGATC                                  |
| EcoRV_EF_fwd              | TCGGGATATCGGCTCCGGTGCCCGTCAGTG                                       |
| ClaI_bgh_bpa_rev          | GTGTATCGATGCCGCTACAGGGCGCGTGGGGAT                                    |
| pMRNA-Inth218 Rev         | TATCCGAGATCTGCTAGCTCATTATTTGATTTCAATTTTG                             |
| pMRNA-Inth218 Fw          | ATCGCCGAATTCCTCGAGGCCACCATGGGAAGAAGG                                 |
| C3Int-CNLS-BglII Rev      | TATCCGAGATCTGCTAGCTTATCATACCTTTCTCTTCTC                              |
| pMRNA-Seq Rev             | TATTCTTCCTACTCAGGCTTTATTC                                            |
| pMRNA-Seq For             | TTGCGTTTGAGACGGGCGACAGATC                                            |
| ClaI_UTF1 enhancer_rev    | GTGTATCGATGCCACCACACCCGGCTAATTTTTG                                   |
| attL(BOP')Fwd (KpnI)      | AAGTGGTACCTGAAGCCTGCTTTATTTTCATTAAGTTGG                              |
| attL(BOP')Rev(NotI)       | GTGAGCGGCCCGCCGGAGGGAGTGGGACAAAATTGAAATC                             |
| attR (POB') Fwd (ClaI)    | GTCTATCGATTCTGTTACAGGTCACTAATACCAT                                   |
| attR (POB') Rev (HindIII) | CTTGAAGCTTGTTTCGCTCAAGTTAATGAAATAAAGCTGA                             |
| attP_fwd                  | GATTCATAGTACTGCATATGTTGTG                                            |
| attP_rev                  | GACTGATAGTGACCTGTTTCGTTGC                                            |
| Puro rev24                | CACCGTGGGCTTGTA CTGGTC                                               |
| Puro rev303               | GGAACCGCTCAACTCGGCCATGC                                              |
| Puro fw509                | CTACGAGCGGCTCGGCTTCACC                                               |
| Puro fw318                | CAACAGATGGAAGGCCTCCTGG                                               |
| Puro 127                  | GAGCTGCAAGAACTCTCCTCAC                                               |
| Pgk_rev                   | CAGGTGAATATCAAATCCTCCTCG                                             |
| cs_attH4X_F1              | GAGTGTTTTCCA ACTTGGTTCCATT                                           |
| cs_attH4X_R1              | AAAACACAGCACGAGA ACTTCGTGA                                           |

|              |                             |
|--------------|-----------------------------|
| cs_attH4X_F2 | CCTGTCTTGCTAGGTTGGGAAGT     |
| cs_attH4X_R2 | TAGAGGAATTGCTAACTAGAATAACCA |
| pr21         | CACAGGAAACAGCTATGACCATG     |
| pr27         | GAACGTCTGGGGTGTGATCCT       |
| pr49         | CCAATACGCAAACCGCCTCTC       |
| pr99         | CTGAATGAAGCCATACCAAACGAC    |
| pr199        | CGTTTACAATTTCCCATTCGCCATTC  |
| 3-GF1        | CATGTGAGATGGGTCTTCCAAATACAG |
| 3-GF2        | GGTATTAAGTCTCCCACCGTTATTGT  |
| 3-GR1        | CACACAGAAACCCCATCCATAGGTCAC |
| 3-GR2        | TTTTATGCTCACAGTGTAACAAAGCC  |
| 24-GF1       | AAATGTAGTCAGGCTTGGTGATTAC   |
| 24-GF2       | TACTGGAAAGAAGCAAAGAGGTATC   |
| 24-GR1       | GAACTTCTAGCAATTACCAGCACAC   |
| 24-GR2       | GTTTTCCCCTCAACTGTAAACAAAG   |
| 59-GF1       | GTGGTTATTTTGCCATTAGTTGATGC  |
| 59-GF2       | CTTAAATAGAGCACACGGATGGGAC   |
| 59-GR1       | CCTCATATGGTAGAACTCCAGCTGG   |
| 59-GR2       | CCACTTTTCCATTGGTTTTATGCTTGG |
| E3-GF1       | TTCAGGAGTTGTTGTAAGGCAGGC    |
| E3-GR1       | CTCTGGGCAGGGCATCTTGAAAG     |
| E3-GF2       | CCTTTCTCTCTGGCTGCCCTTAAC    |
| E3-GR2       | GCACCAACAGCAAAGACCAAAGG     |
| K3-GF2       | GCGCCCACTCTTCTGACTTGTAG     |
| K3-GR2       | GACGTCCACACAGAAACCCCACTG    |
| K3-GF1       | CTTCAGGAGCTCTTGTAAGGCAGGC   |
| K3-GR1       | CCAGGGAAACAGGGTCTAGAGTGG    |
| A3-GF2       | GGCATGGGTGTTAGGGCCATTATG    |
| A3-GR2       | CGTCTAAAGGATCACAACCTCTTGCC  |
| A3-GF1       | AGTGGGAAATCTGGGGTCTCACTG    |
| A3-GR1       | GGAAGGAACGGGCAGCAATCTTTG    |
| EGFP fwd     | CCACATGAAGCAGCACGACTTC      |
| EGFP rev     | GGGTGTTCTGCTGGTAGTGGTC      |



**Supplementary Table 2. *attH* sequence hits obtained using CA/TGCTTTNNNNNNNTAAG/CTTG as query sequence in bioinformatics search along with their chromosomal location and occurrence in the Human genome.**

|    | <b><i>attH</i> sequences in Human genome identified using bioinformatics approach</b> | <b>Chromosome number, nucleotide co-ordinates. (GRCh38/hg38 Assembly)</b>                                                                                                                     | <b>Occurrence per genome</b> |
|----|---------------------------------------------------------------------------------------|-----------------------------------------------------------------------------------------------------------------------------------------------------------------------------------------------|------------------------------|
| 1  | CAACTTAATGAAATAAAGCAG<br>( <i>attH7X</i> )                                            | 1; 106854666 - 106854686<br>1; 157347000 - 157347020<br>3; 137376026 - 137376046<br>5; 64475470 - 64475490<br>12; 33493985 - 33494005<br>12; 88438383 - 88438403<br>12; 102493126 - 102493146 | 7                            |
| 2  | CAGCTTTTTCAATTTAACTTG                                                                 | 6; 31334317 - 31334337<br><u>6_GL000256v2 alt: 2636515-2636535</u><br><u>6_GL000255v2 alt: 2589974-2589994</u>                                                                                | 3                            |
| 3  | CAGCTTTCATAAAATAAGTTG                                                                 | 4; 143909914 - 143909934<br>14; 50663569 - 50663589                                                                                                                                           | 2                            |
| 4  | CAACTTAGCAGACAAAAGCAG                                                                 | <u>2; 27626505 – 27626525</u><br>X; 112382682 -112382702                                                                                                                                      | 2                            |
| 5  | CAAGTTATTCTTCAAAGCAG                                                                  | 1; 19236066 - 19236086                                                                                                                                                                        | 1                            |
| 6  | CAACTTAAAAGGAAAAAGCTG                                                                 | 1; 82574082 - 82574102                                                                                                                                                                        | 1                            |
| 7  | CAACTTATAACTGTAAAGCAG                                                                 | 1; 97122439 - 97122459                                                                                                                                                                        | 1                            |
| 8  | CAACTTATTGAATGAAAGCAG                                                                 | 1; 106471437 - 106471457                                                                                                                                                                      | 1                            |
| 9  | CAACTTAAGACTTGAAAGCTG                                                                 | 1; 110011423 -110011443                                                                                                                                                                       | 1                            |
| 10 | CTGCTTTGGGAAAATAACTTG                                                                 | 1; 116915861- 116915881                                                                                                                                                                       | 1                            |
| 11 | CTGCTTTTCTTTCCTAACTTG                                                                 | 1; 163425240 - 163425260                                                                                                                                                                      | 1                            |
| 12 | CAGCTTTAAAACCTAACTTG                                                                  | 1; 173189485 - 173189505                                                                                                                                                                      | 1                            |
| 13 | CAGCTTTCTGCATATAAGTTG                                                                 | 1; 182796593 182796613                                                                                                                                                                        | 1                            |
| 14 | CAGCTTTTCTATGTTAACTTG                                                                 | 1; 183243106 -183243126                                                                                                                                                                       | 1                            |
| 15 | CAACTTACGGTACAAAAGCTG                                                                 | 1; 183343809 - 183343829                                                                                                                                                                      | 1                            |
| 16 | CAACTTACTGATGTAAAGCAG                                                                 | 1; 208844994 - 208845014                                                                                                                                                                      | 1                            |
| 17 | CAGCTTTTGTTTCCTTAACTTG                                                                | 1; 217312051 - 217312071                                                                                                                                                                      | 1                            |
| 18 | CTGCTTTTTCCTTTTAAAGTTG                                                                | 1; 244735375 - 244735395                                                                                                                                                                      | 1                            |
| 19 | CAACTTATCCTCTTAAAGCAG                                                                 | 2; 4855275 - 4855295                                                                                                                                                                          | 1                            |
| 20 | CAAGTTAGGAACTAAAGCAG                                                                  | 2; 6601353 - 6601373                                                                                                                                                                          | 1                            |
| 21 | CAGCTTTTTGCCCTAACTTG                                                                  | 2; 23652921 - 23652941                                                                                                                                                                        | 1                            |
| 22 | CTGCTTTTGTCTGCTAAGTTG                                                                 | 2; 23652921 - 23652941                                                                                                                                                                        | 1                            |
| 23 | CAACTTATAGCCACAAAGCAG                                                                 | 2; 35463859 - 35463879                                                                                                                                                                        | 1                            |
| 24 | CAGCTTTCTATACATAAGTTG                                                                 | 2; 187498529 -187498549                                                                                                                                                                       | 1                            |
| 25 | CTGCTTTCATTGGTTAACTTG                                                                 | 2; 203262530 - 203262550                                                                                                                                                                      | 1                            |

|    |                        |                          |   |
|----|------------------------|--------------------------|---|
| 26 | CAACTTAGGAAAGAAAAGCTG  | 2; 211166036 -211166056  | 1 |
| 27 | CAAGTTATTCTTAGAAAAGCTG | 2; 235648033 - 235648053 | 1 |
| 28 | CAAGTTAAAGGACAAAAGCTG  | 2; 241393667 - 241393687 | 1 |
| 29 | CAGCTTTTATCCATTAAGTTG  | 3; 17021726 - 17021746   | 1 |
| 30 | CAACTTAGTGCGTAAAAGCTG  | 3; 34949152 - 34949172   | 1 |
| 31 | CAACTTAAAGTTATAAAGCAG  | 3; 49747167 - 49747187   | 1 |
| 32 | CTGCTTTATTAAGTTAAGTTG  | 3; 65371692 - 65371712   | 1 |
| 33 | CTGCTTTTCCATATTAAGTTG  | 3; 84840603 - 84840623   | 1 |
| 34 | CTGCTTTGATTTTATAACTTG  | 3; 95975581 - 95975601   | 1 |
| 35 | CAGCTTTAAATAATTAAGTTG  | 3; 105465612 - 105465632 | 1 |
| 36 | CAAGTTACAATCTAAAAGCTG  | 3; 112543794 - 112543814 | 1 |
| 37 | CTGCTTTCCCCAGCTAACTTG  | 3; 125195186 -125195206  | 1 |
| 38 | CAACTTAAATTGAAAAGCAG   | 3; 163098187 - 163098207 | 1 |
| 39 | CAAGTTATTATATTAAGCAG   | 3; 180355103 - 180355123 | 1 |
| 40 | CAACTTACTGTTTCAAAGCTG  | 3; 196391805 - 196391825 | 1 |
| 41 | CAAGTTATAATCAGAAAAGCTG | 4; 9810661 - 9810681     | 1 |
| 42 | CTGCTTTTTTTTTCTAAGTTG  | 4; 14139515 - 14139535   | 1 |
| 43 | CAGCTTTCAGATATTAAGTTG  | 4; 27810251 - 27810271   | 1 |
| 44 | CAAGTTACAATGTAAAAGCTG  | 4; 33816397 - 33816417   | 1 |
| 45 | CAGCTTTGTGATAATAACTTG  | 4; 57395339 - 57395359   | 1 |
| 46 | CAGCTTCTTTGTTAAGTTG    | 4; 96050717 - 96050737   | 1 |
| 47 | CAACTTAGTGAATAAAAAGCAG | 4; 96575810 - 96575830   | 1 |
| 48 | CAACTTAAATTTCAAAGCAG   | 4; 107399965 -107399985  | 1 |
| 49 | CAACTTACACCTCCAAAGCTG  | 4; 119228746 -119228766  | 1 |
| 50 | CAAGTTATTTAAGCAAAGCAG  | 4; 143440508 - 143440528 | 1 |
| 51 | CAGCTTTTATGAGCTAAGTTG  | 4; 172008324 -172008344  | 1 |
| 52 | CAAGTTATAATAGTAAAGCTG  | 4; 178746053 - 178746073 | 1 |
| 53 | CTGCTTTAAATCTGTAAGTTG  | 4; 184924992 - 184925012 | 1 |
| 54 | CTGCTTTAAAGATGTAAGTTG  | 5; 2196198 - 2196218     | 1 |
| 55 | CTGCTTCTGATTTTAAGTTG   | 5; 6210040 - 6210060     | 1 |
| 56 | CAGCTTTGGTCTATAACTTG   | 5; 17384798 - 17384818   | 1 |
| 57 | CAGCTTTAAAATTTCTAAGTTG | 5; 40747039 - 40747059   | 1 |
| 58 | CTGCTTTAAGATTTTAAGTTG  | 5; 74779791 - 74779811   | 1 |
| 59 | CAAGTTAAGACAGAAAAGCTG  | 5; 83929507 - 83929527   | 1 |
| 60 | CAGCTTTAATTTCTAAGTTG   | 5; 83977220 - 83977240   | 1 |
| 61 | CTGCTTTGTTTCATTAAGTTG  | 5; 106998974- 106998994  | 1 |
| 62 | CAACTTACACAGCCAAAGCAG  | 5; 107019917- 107019937  | 1 |
| 63 | CAAGTTATGCTTATAAAGCTG  | 5; 131651814 - 131651834 | 1 |
| 64 | CAAGTTAAAGGGCAAAGCAG   | 6; 25652052 - 25652072   | 1 |
| 65 | CTGCTTTAAAATTTTAAGTTG  | 6; 35836451 - 35836471   | 1 |
| 66 | CAAGTTAAATATTAAGCTG    | 6; 57254511 - 57254531   | 1 |
| 67 | CAAGTTAAATGATAAAGCTG   | 6; 78368464 - 78368484   | 1 |
| 68 | CTGCTTTAAAATATTAAGTTG  | 6; 91002384 - 91002404   | 1 |

|     |                        |                           |   |
|-----|------------------------|---------------------------|---|
| 69  | CTGCTTTGAGTCAGTAAGTTG  | 6; 108690628 - 108690648  | 1 |
| 70  | CAAGTTAATAAATAAAAGCAG  | 6; 130502719 - 130502739  | 1 |
| 71  | CAGCTTTTTGAAAGTAACTTG  | 6; 134899030 - 134899050  | 1 |
| 72  | CAAGTTATTTAAAAAAGCTG   | 6; 152991109 - 152991129  | 1 |
| 73  | CAGCTTTGAAGGCATAAGTTG  | 6; 158673743 - 158673763  | 1 |
| 74  | CAGCTTTAGGATAGTAACTTG  | 7; 2377245 - 2377265      | 1 |
| 75  | CTGCTTTACATCATTAAGTTG  | 7; 11318471 - 11318491    | 1 |
| 76  | CAAGTTACACACTTAAAGCTG  | 7; 17361521 - 17361541    | 1 |
| 77  | CAAGTTAGTTTTTGAAGCTG   | 7; 49809083 - 49809103    | 1 |
| 78  | CTGCTTTTCCTTGATAACTTG  | 7; 53800631 - 53800651    | 1 |
| 79  | CAGCTTTTAACTGTAAGTTG   | 7; 64579860 - 64579880    | 1 |
| 80  | CAGCTTTCCTCATTAAGTTG   | 7; 83597543 - 83597563    | 1 |
| 81  | CTGCTTTGAATGTATAAGTTG  | 7; 94663282 - 94663302    | 1 |
| 82  | CAAGTTAAACAGCAAAAGCTG  | 7; 97256143 - 97256163    | 1 |
| 83  | CAAGTTACATGGTGAAGCAG   | 7; 115330936 - 115330956  | 1 |
| 84  | CAAGTTATTATCTGAAAGCTG  | 7; 120883773 - 120883793  | 1 |
| 85  | CTGCTTTCATCAGTTAAGTTG  | 7; 139627071 - 139627091  | 1 |
| 86  | CAGCTTTACAGTAATAACTTG  | 7; 157361587 - 157361607  | 1 |
| 87  | CAACTTAAGAGCTTAAAGCAG  | 8; 3722953 - 3722973      | 1 |
| 88  | CAAGTTAGGATGGGAAAGCTG  | 8; 58610454 - 58610474    | 1 |
| 89  | CAAGTTACCCTTTAAAAGCAG  | 8; 71334382 - 71334402    | 1 |
| 90  | CTGCTTTGCCAACTAAGTTG   | 8; 90449166 - 90449186    | 1 |
| 91  | CAAGTTAACCAGAGAAAGCAG  | 8; 100827768 - 100827788  | 1 |
| 92  | CTGCTTTAAGACTATAAGTTG  | 8; 127114987 - 127115007  | 1 |
| 93  | CAACTTAGCTCCTCAAAGCAG  | 8; 128124895 - 128124915  | 1 |
| 94  | CAGCTTTTATTCATAACTTG   | 9; 12155661 - 12155681    | 1 |
| 95  | CAAGTTAATTATTCAAAGCAG  | 9; 26695059 - 26695079    | 1 |
| 96  | CTGCTTTGATCAATTAAGTTG  | 9; 109146961 - 109146981  | 1 |
| 97  | CTGCTTTTAAGGTATAAGTTG  | 9; 113422032 - 113422052  | 1 |
| 98  | CAACTTACTTATAAAGCAG    | 9; 121160218 - 121160238  | 1 |
| 99  | CTGCTTTTAGTTTTTAAGTTG  | 9; 129892186 - 129892206  | 1 |
| 100 | CAGCTTTTTGGTAGTAAGTTG  | 10; 6851438 - 6851458     | 1 |
| 101 | CAAGTTAATCCATCAAAGCTG  | 10; 72501178 - 72501198   | 1 |
| 102 | CTGCTTTTCTTCTGTAAGTTG  | 10; 119438226 - 119438246 | 1 |
| 103 | CAACTTAGCACAAACAAGCTG  | 10; 128454453 - 128454473 | 1 |
| 104 | CAGCTTTTAGGGCATAACTTG  | 11; 13552326 - 13552346   | 1 |
| 105 | CTGCTTTAACTTTTAAGTTG   | 11; 16752336 - 16752356   | 1 |
| 106 | CAAGTTAAATGTAAAAAGCAG  | 11; 72812396 - 72812416   | 1 |
| 107 | CAAGTTATTTAAAATAAAGCAG | 11; 74576294 - 74576314   | 1 |
| 108 | CAGCTTTTTTGAATTAAGTTG  | 11; 103756334 - 103756354 | 1 |
| 109 | CAGCTTTAATGTGCTAACTTG  | 11; 107797655 - 107797675 | 1 |
| 110 | CTGCTTTCCAAGGGTAACTTG  | 11; 116912580 - 116912600 | 1 |
| 111 | CAAGTTATCCAAAAAAGCAG   | 11; 123287626 - 123287646 | 1 |

|     |                        |                           |   |
|-----|------------------------|---------------------------|---|
| 112 | CAAGTTAAAATATGAAAGCAG  | 12; 12845396 - 12845416   | 1 |
| 113 | CAAGTTAAAAAAGAAAAGCAG  | 12; 29161214 - 29161234   | 1 |
| 114 | CAACTTATGACTTAAAAGCAG  | 12; 47114357 - 47114377   | 1 |
| 115 | CAACTTAGACAGAGAAAAGCAG | 12; 52677529 - 52677549   | 1 |
| 116 | CAAGTTAAAACCAGAAAAGCTG | 12; 84928830 - 84928850   | 1 |
| 117 | CAAGTTAGAAAGCTAAAGCAG  | 12; 129048549 - 129048569 | 1 |
| 118 | CAAGTTAAGTTTGAAAAGCAG  | 13; 53365028 - 53365048   | 1 |
| 119 | CTGCTTTTGTCTCTTAAGTTG  | 13; 78663499 - 78663519   | 1 |
| 120 | CTGCTTTAGTGAGTTAACTTG  | 13; 82818196 - 82818216   | 1 |
| 121 | CAACTTATTCAATGAAAGCAG  | 14; 42949179 - 42949199   | 1 |
| 122 | CAACTTACATCAGAAAAGCAG  | 15; 40032198 - 40032218   | 1 |
| 123 | CAGCTTTTGTGTCTTAAGTTG  | 15; 53332459 - 53332479   | 1 |
| 124 | CAAGTTACAATTAATAAGCTG  | 15; 101712807 - 101712827 | 1 |
| 125 | CAGCTTTGTCAATGTAAGTTG  | 17; 43557851 - 43557871   | 1 |
| 126 | CTGCTTTTTATGTTAACTTG   | 18; 52621151 - 52621171   | 1 |
| 127 | CTGCTTTCTGTAATTAAGTTG  | 18; 53222226 - 53222246   | 1 |
| 128 | CAAGTTAAGATTTTAAAGCAG  | 19; 7801117 - 7801137     | 1 |
| 129 | CAAGTTAAACAAGAAAAGCTG  | 20; 5390775 - 5390795     | 1 |
| 130 | CTGCTTTTATTAATAACTTG   | 20; 9367358 - 9367378     | 1 |
| 131 | CTGCTTTTAAATACTAAGTTG  | 20; 19923109 - 19923129   | 1 |
| 132 | CTGCTTTCAAACACTAAGTTG  | 21; 35612903 - 35612923   | 1 |
| 133 | CTGCTTTTTAATTATAAGTTG  | 22; 27899206 - 27899226   | 1 |
| 134 | CTGCTTTGTTCTCTTAAGTTG  | X; 15961638 - 15961658    | 1 |
| 135 | CTGCTTTCATTAATAAGTTG   | X; 26371828 - 26371848    | 1 |
| 136 | CAGCTTTAATGGTCTAAGTTG  | X; 43113758 - 43113778    | 1 |
| 137 | CTGCTTTGGATTCTTAAGTTG  | X; 74743279 - 74743299    | 1 |
| 138 | CAGCTTTGAAGTTGTAAGTTG  | X; 91736877 - 91736897    | 1 |
| 139 | CTGCTTTTTTTTTATAAGTTG  | X; 111195171 - 111195191  | 1 |
| 140 | CTGCTTTTCATAAGTAAGTTG  | X; 124065934 - 124065954  | 1 |

**Note: The underlined sequences have been found in the updated version of Human genome assembly (GRCh38/hg38)**

**Supplementary Table 3. A list of *attH7X* sequences (underlined) along with their flanking sequences, *LINE-1* family and location in the Human genome.**

| <b>attH7X<br/>chromosomal locus</b>             | <b>Flanking sequences</b>                                                                                                                                       | <b>L1<br/>Family</b> | <b>Location;<br/>Flanking genes</b>                                                                                                                                                                                                                                                                                   |
|-------------------------------------------------|-----------------------------------------------------------------------------------------------------------------------------------------------------------------|----------------------|-----------------------------------------------------------------------------------------------------------------------------------------------------------------------------------------------------------------------------------------------------------------------------------------------------------------------|
| chr1:106854666-<br>106854686<br>Reverse strand  | TCAATAGCTGAATCAATCAAGAAG<br>AAAAAAGGATATCAGAGATTGAA<br>GAT <b>CAACTTAATGAAATAAAGCA</b><br><b>G</b> GAAAGACAAGATTAGAGAAAAAA<br>GAAAAGGAATGAAAAAACTTCC<br>AAGAT   | L1PA7                | Intergenic;<br>Gene ENSG00000237460<br>Location Chromosome 1: 106,818,239-106,838,167<br>Gene type Known lincRNA<br>Gene ENSG00000198890<br>protein arginine methyltransferase 6<br>(PRMT6)<br>Location Chromosome 1: 107,056,679-107,059,294<br>Gene type Known protein coding                                       |
| chr5:64475470-<br>64475490<br>Reverse strand    | TCAATAGCTGAATCGATCGAGCAG<br>AAGAAATGATATCAGAGATTGGA<br>GAT <b>CAACTTAATGAAATAAAGCA</b><br><b>G</b> GAAAGACAAGATTACAGAAAAAA<br>GAACGAAAAGTAATGAACAAAGC<br>CTCCA  | L1P3                 | Gene ENSG00000236068<br>Location Chromosome 5: 64,404,512-64,486,615<br>Gene type Known unitary pseudogene                                                                                                                                                                                                            |
| chr12:33493985-<br>33494005<br>Reverse strand   | TCAACAGCCAAATCAATCAAGCGG<br>AAGAAAGGATATCAGAGATTGAA<br>GAT <b>CAACTTAATGAAATAAAGCA</b><br><b>G</b> GAAAACAATATTAGATAAAAAA<br>GAATGAAAAGGAACAAACAAAGC<br>CTCTA   | L1PA7                | Intergenic;<br>Gene ENSG00000110975<br>synaptotagmin X<br>Location Chromosome 12: 33,374,238-33,439,819<br>Gene type Known protein coding<br>Gene ENSG00000212475<br>RNA, U6 small nuclear 400, pseudogene<br>Location Chromosome 12: 33,576,095-33,576,200<br>Gene type Known snRNA                                  |
| chr12:88438383-<br>88438403<br>Reverse strand   | TCAATAGCTGAATCAATCAAAACAG<br>AAGAAAGGATATCAAAGATTGAA<br>GAT <b>CAACTTAATGAAATAAAGCA</b><br><b>G</b> GAAAGACAAGATTAGAGAAAAAA<br>GAATGAAAAGGAATGAACAAAGC<br>CTCCA | L1PA7                | Intergenic;<br>Gene ENSG00000199245<br>Y RNA<br>Location Chromosome 12: 88,430,442-88,430,550<br>Gene type Novel misc RNA<br>Gene ENSG00000049130<br>KIT ligand (KITLG)<br>Location Chromosome 12: 88,492,793-88,580,851<br>Gene type Known protein coding                                                            |
| chr1:157347000-<br>157347020<br>Forward strand  | TGAAGGCTTTGTTTCATTCCTTTTCA<br>TTCTTTTTTCTCTACTTTGTCTTC<br><b>CTGCTTTATTTCATTAAGTTGAT</b><br>CTTCAATCTCTGATATCCTTTCTTC<br>TGCTTCATCAATTCGGCTACTGA                | L1PA7                | Intergenic;<br>Gene ENSG00000237189<br>Location Chromosome 1: 157,287,703-157,288,053<br>Gene type Known lincRNA<br>Gene ENSG00000143297<br>Fc receptor-like 5 (FCRL 5)<br>Location Chromosome 1: 157,513,377-157,552,520<br>Gene type Known protein coding                                                           |
| chr3:137376026-<br>137376046<br>Forward strand  | TTCTTGAAGTCTTTGTTTCTTTTCA<br>TTCTTTTTTCTCTACTTTGTCTGC<br><b>CTGCTTTATTTCATTAAGTTGAT</b><br>CTTCAATATTTGGTATTCTTTCTTC<br>TGCTTGATCAATTCAGCTGTTA                  | L1PA7                | Intergenic;<br>Gene ENSG00000174564<br>interleukin 20 receptor beta (IL20RB)<br>Location Chromosome 3: 136,946,230-137,011,085<br>Gene type Known protein coding<br>Gene ENSG00000201325<br>RNA, 5S ribosomal pseudogene 142<br>(RNA5SP142)<br>Location Chromosome 3: 137,518,134-137,518,255<br>Gene type Known rRNA |
| chr12:102493126-<br>102493146<br>Forward strand | TGGAGGCTTTGTTTCATTCCTTTTTA<br>TTCTTTTTTCTCTACTTTGTCTTC<br><b>CTGCTTTATTTCATTAAGTTGAT</b><br>CTTCAATCTCTGATATCCATTCTTC<br>CACTTGATCGATTGACTATTGA                 | L1PA7                | Intergenic;<br>Gene ENSG00000017427<br>(IGF 1) insulin-like growth factor 1<br>(somatomedin C)<br>Location Chromosome 12: 102,395,867-102,480,645<br>Gene type Known protein coding<br>Gene ENSG00000257254<br>Location Chromosome 12: 102,513,251-102,513,655<br>Gene type Known processed pseudogene                |

**Supplementary Table 4. Alignment of 935 LINE 1 elements containing 18bp attH4X sequence flanked by 300bp upstream and downstream sequences (Vector NTI , AlignX) to design the primer pairs (cs\_ attH4X \_F1 & cs\_ attH4X \_R1) and (cs\_ attH4X \_F2 & cs\_ attH4X \_R2, not shown) in the consensus flanking region of attH4X. The respective subfamilies of 935 LINE1 elements that are shown in the right column correspond to the serial numbers of the sequences on the left side of the alignment.**



cs\_attH4X\_F1 primer  
alignment

attH4X  
alignment

cs\_attH4X\_R1 primer  
alignment

120-240 seq  
*LINE-1*  
subfamilies

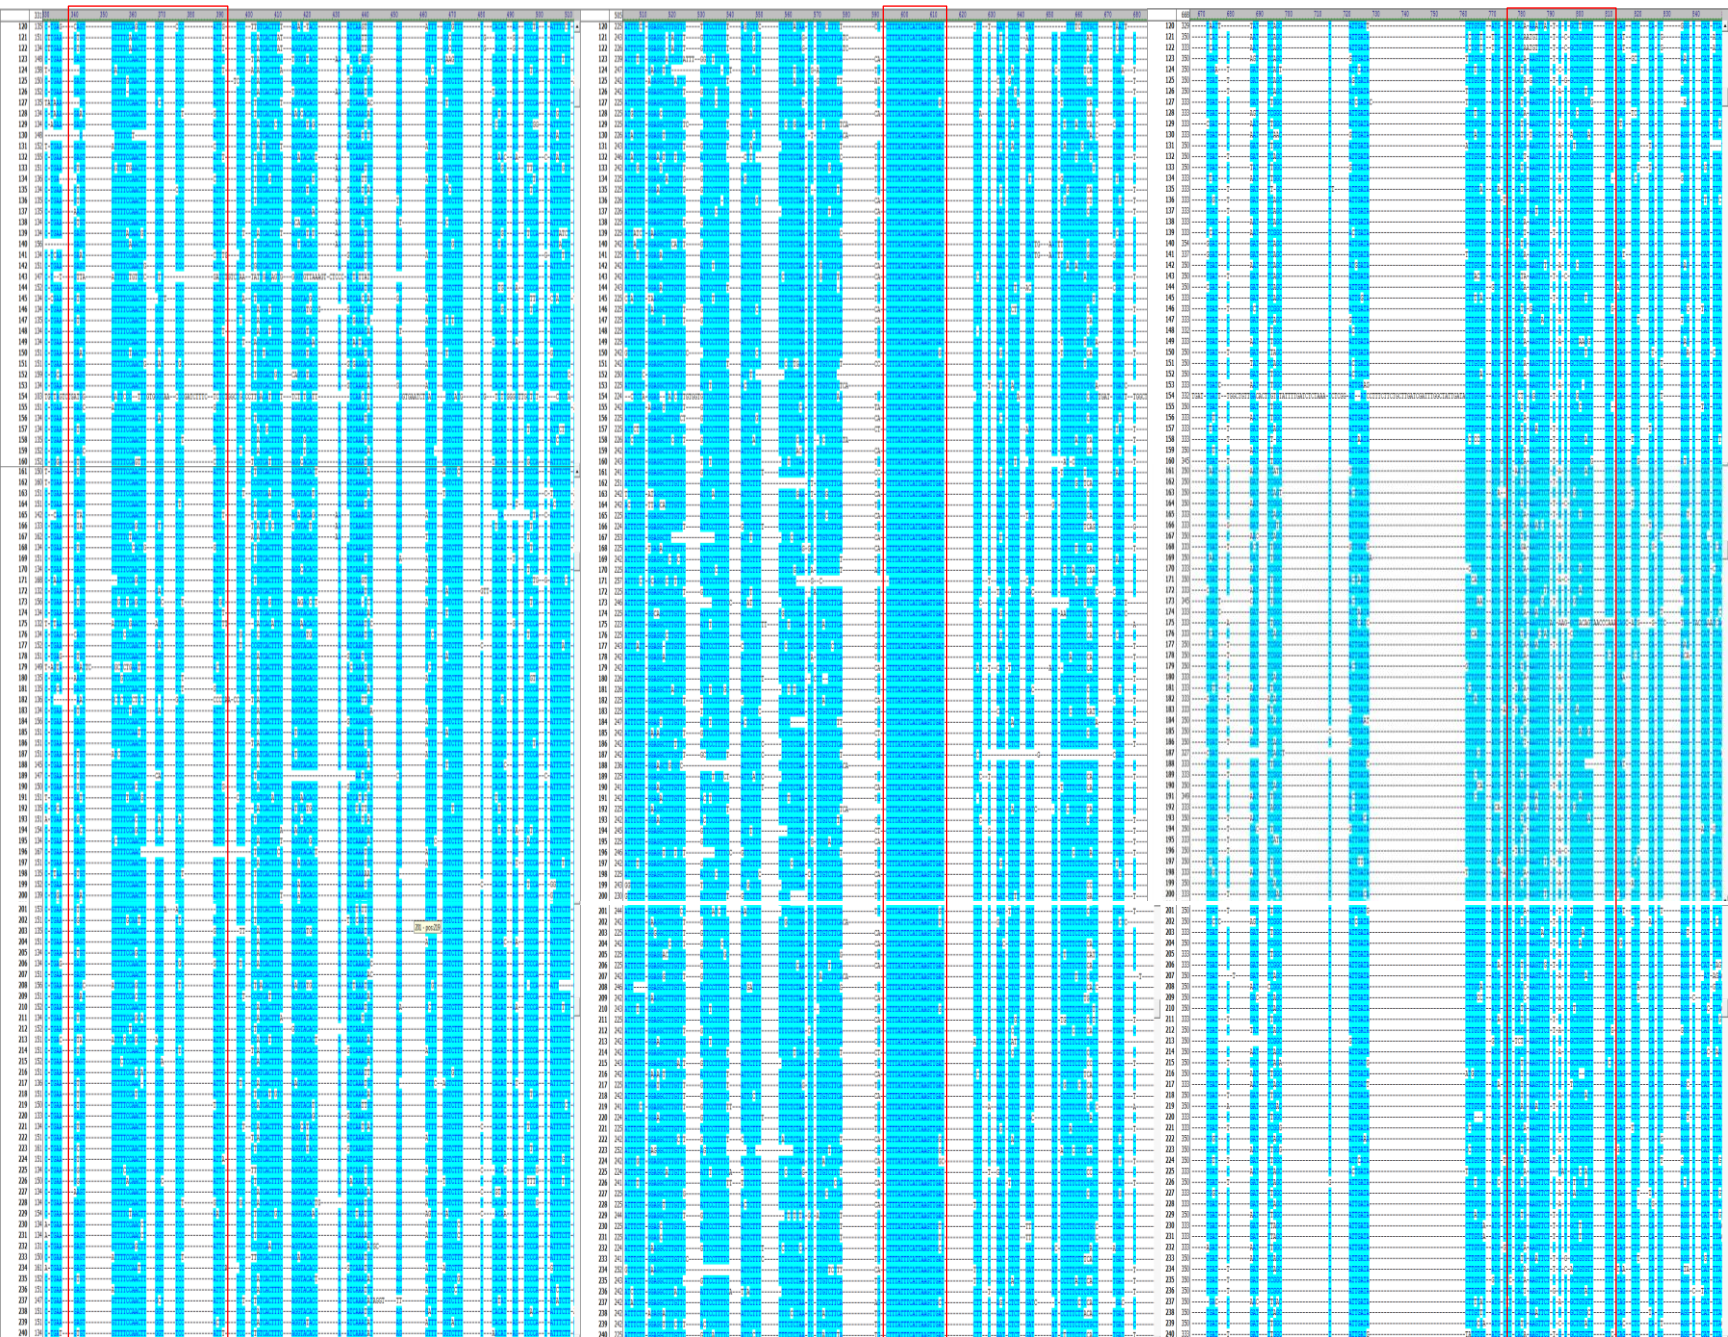

- L1P2
- L1PA7
- L1PA8
- L1PA8
- L1PA9
- L1PA8
- L1PA9
- L1PA7
- L1PA10
- L1PA7
- L1PA11
- L1P2
- L1PA12
- L1P2
- L1PA13
- L1P2
- L1PA14
- L1PA7
- L1PA15
- L1PA7
- L1PA16
- L1PA7
- L1PA17
- L1P3
- L1PA18
- L1PA7
- L1PA19
- L1PA7
- L1PA20
- L1PA8
- L1PA21
- L1PA8
- L1PA22
- L1PA7
- L1PA23
- L1PA7
- L1PA24
- L1PA8
- L1PA25
- L1PA7
- L1PA26
- L1P2
- L1PA27
- L1PA7
- L1PA28
- L1PA7
- L1PA29
- L1PA7
- L1PA30
- L1P3
- L1PA31
- L1PA4
- L1PA32
- L1PA7
- L1PA33
- L1PA7
- L1PA34
- L1PA7
- L1PA35
- L1PA7
- L1PA36
- L1PA7
- L1PA37
- L1P3/L1PA7
- L1PA38
- L1PA7
- L1PA39
- L1PA7
- L1PA40
- L1PA7
- L1PA41
- L1PA7
- L1PA42
- L1PA7
- L1PA43
- L1PA7
- L1PA44
- L1PA7
- L1PA45
- L1PA7
- L1PA46
- L1P3
- L1PA47
- L1PA7
- L1PA48
- L1PA7
- L1PA49
- L1PA6
- L1PA50
- L1PA7
- L1PA51
- L1PA7
- L1PA52
- L1PA7
- L1PA53
- L1PA7
- L1PA54
- L1PA7
- L1PA55
- L1PA4
- L1PA56
- L1PA7
- L1PA57
- L1PA5
- L1PA58
- L1PA8
- L1PA59
- L1PA8
- L1PA60
- L1PA7
- L1PA61
- L1P2
- L1PA62
- L1P2
- L1PA63
- L1P3
- L1PA64
- L1PA7
- L1PA65
- L1P3
- L1PA66













cs\_attH4X\_F1 primer alignment

attH4X alignment

cs\_attH4X\_R1 primer alignment

840-933 seq  
*LINE-1*  
subfamilies

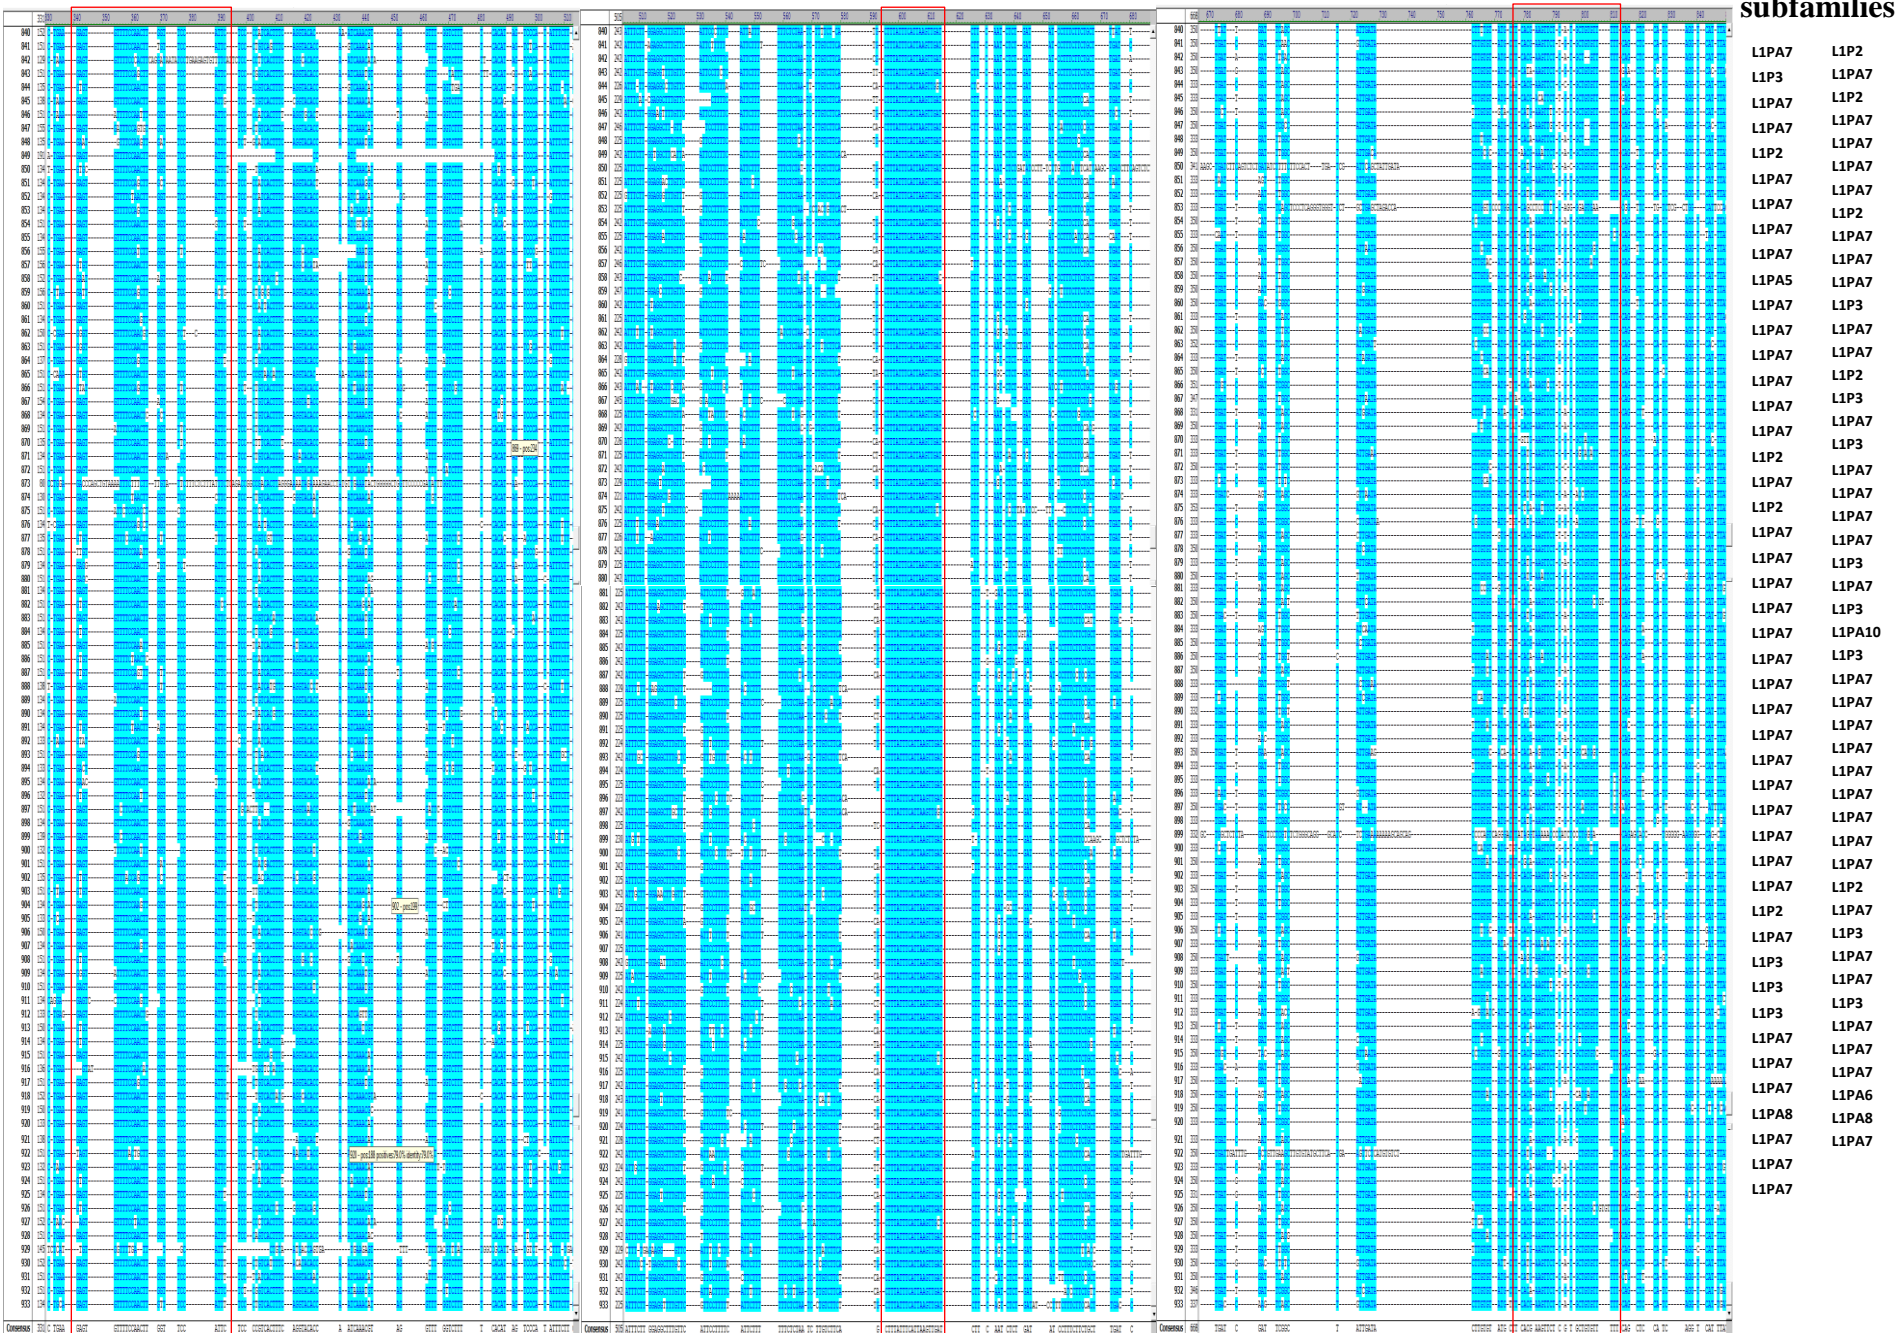

**Supplementary Table 5. Information on *attH4X* sequences in the targeted clones from different cell lines.**

| Targeted Clones (Targeting Vector)                  | Targeted <i>attH4X</i> sequence and resulting <i>attL</i> and <i>attR</i> sequences                                                                      | Genomic location of targeted <i>attH4X</i> | Length of targeted <i>LINE-1</i> (bp) | <i>LINE-1</i> subfamily | Retro-transposition functional status* |
|-----------------------------------------------------|----------------------------------------------------------------------------------------------------------------------------------------------------------|--------------------------------------------|---------------------------------------|-------------------------|----------------------------------------|
| HT1080 # 3 (pattP4X-PGKssPuro)                      | TTTTCTCTAACTAGTCTTCATGCTTTATTTTCATTAAGTTGATCTTCAATCTCTGATATCC<br>TTTTCTCTAACTAGTCTTCATGCTTTATTTTCATTAAGTTG//CAGCTTTATTTTCATTAAGTTGATCTTCAATCTCTGATATCC   | chr19:35188923-35188943 (-)                | 3188                                  | L1P3                    | Truncated                              |
| HT1080 # 11 (pattP4X-PGKssPuro)                     | TTTTCTCTAACTAGTCTTCATGCTTTATTTTCATTAAGTTGATCTTCAATCTCTGATATCC<br>TTTTCTCTAACTAGTCTTCATGCTTTATTTTCATTAAGTTG//CAGCTTTATTTTCATTAAGTTGATCTTCAATCTCTGATATCC   | chr4:152517906-152517926                   | 3623                                  | L1PA7                   | Truncated                              |
| HT1080 # 18 (pattP4X-PGKssPuro)                     | TTTTCTCTGATCTTGTCTTCACCTTTATTTTCATTAAGTTGATCTTCAGTCACTGATACCC<br>TTTTCTCTGATCTTGTCTTCACCTTTATTTTCATTAAGTTG//CAGCTTTATTTTCATTAAGTTGATCTTCAGTCACTGATACCC   | chr9:15026596 - 15026616(-)                | 5511                                  | L1PA6                   | Full length non intact                 |
| HT1080 # 19 (pattP4X-PGKssPuro)                     | TTTTCTCTAACTAGTCTTCATGCTTTATTTTCATTAAGTTGGTCTTCAATCTCTGATATCC<br>TTTTCTCTAACTAGTCTTCATGCTTTATTTTCATTAAGTTG//CAGCTTTATTTTCATTAAGTTGGTCTTCAATCTCTGATATCC   | chr2:153753805-153753825(-)                | 6467                                  | L1PA7                   | Full length non intact                 |
| HT1080 # 21 (pattP4X-PGKssPuro)                     | TTCTCTCTAACTAGTCTTCACACTTTATTTTCATTAAGTTGATCTTCAATCTCTGATATCC<br>TTCTCTCTAACTAGTCTTCACACTTTATTTTCATTAAGTTG//CAGCTTTATTTTCATTAAGTTGATCTTCAATCTCTGATATCC   | chr7:111345001-111345021                   | 3455                                  | L1PA7                   | Truncated                              |
| HeLa # H1-C7 (pattP4X-PGKssPuro)                    | TTTTCCCTAACCTTGTCTTCATGCTTTATTTTCATTAAGTTGATTGTCAATCTCTGTTATCT<br>TTTTCCCTAACCTTGTCTTCATGCTTTATTTTCATTAAGTTG//CAGCTTTATTTTCATTAAGTTGATTGTCAATCTCTGTTATCT | chr4:90488464-90488484(-)                  | 1592                                  | L1P2                    | Truncated                              |
| HeLa # H1-C26 (pattP4X-PGKssPuro)                   | TTTTCTCTAACTAGTCTTCATGCTTTATTTTCATTAAGTTGATCTTCAGTCTCTGATATCC<br>TTTTCTCTAACTAGTCTTCATGCTTTATTTTCATTAAGTTG//CAGCTTTATTTTCATTAAGTTGATCTTCAGTCTCTGATATCC   | chr7:94450365-94450385                     | 1581                                  | L1PA7                   | Truncated                              |
| HeLa # H2-C1 & # H2-C12 (pattP4X-PGKssPuro)         | TTTTCTCTAACTAGTCTTCACGCTTTATTTTCATTAAGTTGATCTTCAATTTCTGATAACC<br>TTTTCTCTAACTAGTCTTCACGCTTTATTTTCATTAAGTTG//CAGCTTTATTTTCATTAAGTTGATCTTCAATTTCTGATAACC   | Chr4:142034109-142034129                   | 1070                                  | L1PA7                   | Truncated                              |
| HeLa # H2-C15 (pattP4X-PGKssPuro)                   | TTTTCTCTAACTAGTCTTCATGCTTTATTTTCATTAAGTTGATCTTCAATCTCTGATATCC<br>TTTTCTCTAACTAGTCTTCATGCTTTATTTTCATTAAGTTG//CAGCTTTATTTTCATTAAGTTGATCTTCAATCTCTGATATCC   | chr1:55897841-55897861(-)                  | 6568                                  | L1PA7                   | Full length non intact                 |
| NEB-1 # N2-C3 (pattP4X-PGKssPuro)                   | TTTTCTCTAACTAGTCTTCATGCTTTATTTTCATTAAGTTGATCTTCAGTCTATGATATCC<br>TTTTCTCTAACTAGTCTTCATGCTTTATTTTCATTAAGTTG//CAGCTTTATTTTCATTAAGTTGATCTTCAGTCTATGATATCC   | chr5:72277503-72277523                     | 2323                                  | L1PA7                   | Truncated                              |
| NEB-1 # N2-C11 (pattP4X-PGKssPuro)                  | TTTTCAGTAATCTTCTCTTCATGCTTTATTTTCATTAAGTTGATCTTCAGTCTCTGATATCC<br>TTTTCAGTAATCTTCTCTTCATGCTTTATTTTCATTAAGTTG//CAGCTTTATTTTCATTAAGTTGATCTTCAGTCTCTGATATCC | chrX:31488017-31488037                     | 6405                                  | L1PA7                   | Full length non intact                 |
| HT1080_pC3#A (pattP4X-PGKssPuro) (C3mRNA Exp)       | TTTTCTCTAACTAGTCTTCATGCTTTATTTTCATTAAGTTGATCTTCAATCTCTGATATCC<br>TTTTCTCTAACTAGTCTTCATGCTTTATTTTCATTAAGTTG//CAGCTTTATTTTCATTAAGTTGATCTTCAATCTCTGATATCC   | chr3:151604346-151604356(-)                | 2445                                  | L1P3                    | Truncated                              |
| HT1080_pC3#B (pattP4X-PGKssPuro) (C3mRNA Exp)       | TTTCCTCGAATCTTGTCTTCACACTTTATTTTCATTAAGTTGATCTTCAATCTCTGATATCG<br>TTTCCTCGAATCTTGTCTTCACACTTTATTTTCATTAAGTTG//CAGCTTTATTTTCATTAAGTTGATCTTCAATCTCTGATATCG | chr6:115967740-115967760(-)                | 4440                                  | L1P3                    | Truncated                              |
| HT1080_mRNA C3#C (pattP4X-PGKssPuro) (C3mRNA Exp)   | TTTTCTCTAACTAGTCTTCATCTTTATTTTCATTAAGTTGATCTTCAGTCACTGATATGC<br>TTTTCTCTAACTAGTCTTCATCTTTATTTTCATTAAGTTG//CAGCTTTATTTTCATTAAGTTGATCTTCAGTCACTGATATGC     | chr6:110001570-110001590(-)                | 3346                                  | L1PA7                   | Truncated                              |
| HT1080_mRNA C3#D (pattP4X-PGKssPuro) (C3mRNA Exp)   | TTTTCTCTAACTAGTCTTCACACTTTATTTTCATTAAGTTGATCTTCAATCTCTGATATCC<br>TTTTCTCTAACTAGTCTTCACACTTTATTTTCATTAAGTTG//CAGCTTTATTTTCATTAAGTTGATCTTCAATCTCTGATATCC   | chr3:157783598-157783608(-)                | 522                                   | L1P2                    | Truncated                              |
| HT1080_mRNA C3#E (pattP4X-PGKssPuro) (C3mRNA Exp)   | TTTTCTCTAACTAGTCTTCACCTTTATTTTCATTAAGTTGATCTTCCATCTCTGATATTT<br>TTTTCTCTAACTAGTCTTCACCTTTATTTTCATTAAGTTG//CAGCTTTATTTTCATTAAGTTGATCTTCCATCTCTGATATTT     | chr1:181239747-181239767                   | 4244                                  | L1PA7                   | Truncated                              |
| HT1080_mRNA C3#1 (pattP4X-PGKssPuro) (C3-CNLS mRNA) | TTTTCTCTAACTAGTCTTCATGCTTTATTTTCATTAAGTTGATCTTCAATCTCTGTTATCC<br>TTTTCTCTAACTAGTCTTCATGCTTTATTTTCATTAAGTTG//CAGCTTTATTTTCATTAAGTTGATCTTCAATCTCTGTTATCC   | chr5:9938593-9938613(-)                    | 1029                                  | L1P1                    | Truncated                              |
| HT1080_pC3#1 (pattP4X-PGKssPuro) pC3-CNLS           | TGTTCTCTAACTAGTCTTCATGCTTTATTTTCATTAAGTTGATCTTCAATCTCTGATATCC<br>TGTTCTCTAACTAGTCTTCATGCTTTATTTTCATTAAGTTG//CAGCTTTATTTTCATTAAGTTGATCTTCAATCTCTGATATCC   | chr3:114897186-114897206                   | 2058                                  | L1PA7                   | Truncated                              |
| HT1080 #89 (pattP4X-PGKssPuro-EF-eGFP)              | TTTTCTCTAACTAGTCTTCACACTTTATTTTCATTAAGTTGATCTTCAATCTCTGATATCC<br>TTTTCTCTAACTAGTCTTCACACTTTATTTTCATTAAGTTG//CAGCTTTATTTTCATTAAGTTGATCTTCAATCTCTGATATCC   | chr7:17848142-17848162(-)                  | 6461                                  | L1PA7                   | Full length non intact                 |
| HT1080 #51 (pattP4X-PGKssPuro-EF-eGFP)              | TTTTCTCTAACTAGTCTTCATGCTTTATTTTCATTAAGTTGATCTTCAATCTCCGATATCC<br>TTTTCTCTAACTAGTCTTCATGCTTTATTTTCATTAAGTTG//CAGCTTTATTTTCATTAAGTTGATCTTCAATCTCCGATATCC   | chr4: 90010246-90010266                    | 2189                                  | L1PA7                   | Truncated                              |
| hESC#3 (pTZattP4X-UN-EF1a-eGFP)                     | TTTTCTCTAACTAGTCTTCACGCTTTATTTTCATTAAGTTGGCATTATAAAAAAGCATTGC<br>TTTTCTCTAACTAGTCTTCACGCTTTATTTTCATTAAGTTG//CAGCTTTATTTTCATTAAGTTGGCATTATAAAAAAGCATTGC   | chrX: 43585650 - 43585670                  | 6259                                  | L1PA7                   | Full length non intact                 |

|                                                          |                                                                                                                                                            |                             |      |        |                        |
|----------------------------------------------------------|------------------------------------------------------------------------------------------------------------------------------------------------------------|-----------------------------|------|--------|------------------------|
| hESC#24<br>(pTZattP4X-UN-EF1[-eGFP])                     | TATTCTCTAATCTTGTCTTCATGCTTTATTTTCATTAAGTTGATCTTCAATCTCTGATAGCC<br>TATTCTCTAATCTTGTCTTCATGCTTTATTTTCATTAAGTTG//CAGCTTTATTTTCATTAAGTTGATCTTCAATCTCTGATAGCC   | chr5: 12672998 – 12673018   | 2152 | L1P3   | Truncated              |
| hESC#59<br>(pTZattP4X-UN-EF1[-eGFP])                     | TTTTCTCTAATCTTGTCTTCACACTTTATTTTCATTAAGTTGATCTTCAATCTCTGATATCC<br>TTTTCTCTAATCTTGTCTTCACACTTTATTTTCATTAAGTTG//CAGCTTTATTTTCATTAAGTTGATCTTCAATCTCTGATATCC   | chr1: 84245320 - 84245340   | 4937 | L1PA7  | Truncated              |
| hESC A3 clone<br>(pTZattP4X-UN-EF1[-eGFP])               | TTTTCTCTAATCTTGTCTTCACACTTTATTTTCATTAAGTTGATCTTCAAACCTCTGATATCC<br>TTTTCTCTAATCTTGTCTTCACACTTTATTTTCATTAAGTTG//CAGCTTTATTTTCATTAAGTTGATCTTCAAACCTCTGATATCC | chrX:64787931-64787952      | 1916 | L1PA7  | Truncated              |
| hESC E3 clone<br>(pattP4X-PGKssPuro-UN-EF-eGFP)          | TTTTCTCTAATCTTGGCTTCACACTTTATTTTCATTAAGTTGATCTTCAATCTCTTATATCC<br>TTTTCTCTAATCTTGGCTTCACACTTTATTTTCATTAAGTTG//CAGCTTTATTTTCATTAAGTTGATCTTCAATCTCTTATATCC   | chr1:213884581-213884602    | 6423 | L1PA7  | Full length non intact |
| hESC K4 clone<br>(pattP4X-PGKssPuro-UN-EF-eGFP)          | TTTTCTCTAACTTGTCTTCATGCTTTATTTTCATTAAGTTGATCTTCAATCTCTCGTATCC<br>TTTTCTCTAACTTGTCTTCATGCTTTATTTTCATTAAGTTG//CAGCTTTATTTTCATTAAGTTGATCTTCAATCTCTCGTATCC     | chr13:46195229-46195250     | 6439 | L1PA7  | Full length non intact |
| hESC A20 clone<br>(pattP4X-PGKssPuro-UN-EF-eGFP)         | TTTTCTCTAATCTTGTCTTCACACTTTATTTTCATTAAGTTGATCTTCAATCTTGTATAGCC<br>TTTTCTCTAATCTTGTCTTCACACTTTATTTTCATTAAGTTG//CAGCTTTATTTTCATTAAGTTGATCTTCAATCTTGTATAGCC   | chr5:72103592-72103613      | 6302 | L1PA7  | Full length non intact |
| hESC K1 clone<br>(pattP4X-PGKssPuro-UN-EF-eGFP)          | TTTTCTCTAATCTTGGCTTCACGCTTTATTTTCATTAAGTTGATCTTCAGTCTCTGATATCC<br>TTTTCTCTAATCTTGGCTTCACGCTTTATTTTCATTAAGTTG//CAGCTTTATTTTCATTAAGTTGATCTTCAGTCTCTGATATCC   | chr7:133653822-133653843    | 6485 | L1PA7  | Full length non intact |
| hESC L2 clone<br>(pattP4X-PGKssPuro-UN-EF-eGFP)          | TCTTCTCTAATCTTGTCTTCACGCTTTATTTTCATTAAGTTGATCTTCAAACCTCTGATATCC<br>TCTTCTCTAATCTTGTCTTCACGCTTTATTTTCATTAAGTTG//CAGCTTTATTTTCATTAAGTTGATCTTCAAACCTCTGATATCC | chr1:84910263-84910284      | 6472 | L1PA7  | Full length non intact |
| hESC B16 clone<br>(pattP4X-PGKssPuro-UN-EF-eGFP)         | TTTTCTCTAATGTTGTCTTCACACTTTATTTTCATTAAGTTGATCTTCAGTCTCTGATATCC<br>TTTTCTCTAATGTTGTCTTCACACTTTATTTTCATTAAGTTG//CAGCTTTATTTTCATTAAGTTGATCTTCAGTCTCTGATATCC   | chr3:111164680-111164701    | 6423 | L1PA7  | Full length non intact |
| hESC K6 clone<br>(pattP4X-PGKssPuro-UN-EF-eGFP)          | TTTTCTCTAATCTTGGCTTCACGCTTTATTTTCATTAAGTTGATCTTCAGTCTCTGATATCC<br>TTTTCTCTAATCTTGGCTTCACGCTTTATTTTCATTAAGTTG//CAGCTTTATTTTCATTAAGTTGATCTTCAGTCTCTGATATCC   | chr7:133653822-133653843    | 6485 | L1PA7  | Full length non intact |
| hESC L1 clone<br>(pattP4X-PGKssPuro-UN-EF-eGFP)          | TTTTCTCTAATCTTGGCTTCACGCTTTATTTTCATTAAGTTGATCTTCAGTCTCTGATATCC<br>TTTTCTCTAATCTTGGCTTCACGCTTTATTTTCATTAAGTTG//CAGCTTTATTTTCATTAAGTTGATCTTCAGTCTCTGATATCC   | chr7:133653822-133653843    | 6485 | L1PA7  | Full length non intact |
| hESC M5 clone<br>(pattP4X-PGKssPuro-UN-EF-eGFP)          | TTTTCTCTAACTTCTTTTCACGCTTTATTTTCATTAAGTTGATCTTCAATCTCAATACGC<br>TTTTCTCTAACTTCTTTTCACGCTTTATTTTCATTAAGTTG//CAGCTTTATTTTCATTAAGTTGATCTTCAATCTCAATACGC       | chr1:76244691-76244712(-)   | 6151 | L1PA4  | Full length non intact |
| hESC M9 clone<br>(pattP4X-PGKssPuro-UN-EF-eGFP)          | TTTTCTCTAATCTTGTCTTCACACTTTATTTTCATTAAGTTGATCTTCCATCTCTGATATCC<br>TTTTCTCTAATCTTGTCTTCACACTTTATTTTCATTAAGTTG//CAGCTTTATTTTCATTAAGTTGATCTTCCATCTCTGATATCC   | chr7:80319732-80319753(-)   | 6371 | L1PA7  | Full length non intact |
| hESC A8 clone<br>(pattP4X-PGKssPuro-UN-EF-eGFP)          | TTTTCTCAATCTTGTCTTCATGCTTTATTTTCATTAAGTTGATCTTCAATCTCTGTTATCC<br>TTTTCTCAATCTTGTCTTCATGCTTTATTTTCATTAAGTTG//CAGCTTTATTTTCATTAAGTTGATCTTCAATCTCTGTTATCC     | chr5:9938285-9938306(-)     | 1029 | L1P1   | Truncated              |
| hESC A17 clone<br>(pattP4X-PGKssPuro-UN-EF-eGFP)         | TTTTCTCTAATCTTGTCTTCACACTTTATTTTCATTAAGTTGATCTTCAATCTCTGATATCC<br>TTTTCTCTAATCTTGTCTTCACACTTTATTTTCATTAAGTTG//CAGCTTTATTTTCATTAAGTTGATCTTCAATCTCTGATATCC   | chr1:92719737-92719758(-)   | 5690 | L1PA7  | Truncated              |
| hESC G4 clone<br>(pattP4X-PGKssPuro-UN-EF-eGFP)          | TTTTATCTAATCTTGTCTTCATGCTTTATTTTCATTAAGTTGATCTTCAATCTCTGATATCC<br>TTTTATCTAATCTTGTCTTCATGCTTTATTTTCATTAAGTTG//CAGCTTTATTTTCATTAAGTTGATCTTCAATCTCTGATATCC   | chrX:38949476-38949497(-)   | 2162 | L1PA7  | Truncated              |
| HT1080 -19<br>(pTZ18R-attL4X/attR4X-PGKssPuro-UTF1-EGFP) | TTTTCTCTAATCTTGTCTTCGCTTTATTTTCATTAAGTTGATCTTCAATCTCTGATATCC<br>TTTTCTCTAATCTTGTCTTCGCTTTATTTTCATTAAGTTG//CTGCTTTATTTTCATTAAGTTGATCTTCAATCTCTGATATCC       | chr2:150835444-150835464(-) | 5080 | L1PA7  | Full length non intact |
| HT1080-26<br>(pTZ18R-attL4X/attR4X-PGKssPuro-UTF1-EGFP)  | TTTTCTCTAATCTTGTCTTCACACTTTATTTTCATTAAGTTGATCTTCAGTCTCATATCTTT<br>TTTTCTCTAATCTTGTCTTCACACTTTATTTTCATTAAGTTG//CTGCTTTATTTTCATTAAGTTGATCTTCAGTCTCATATCTTT   | chr21:19146794-19146814     | 6451 | L1PA7  | Full length non intact |
| HT1080-29<br>(pTZ18R-attL4X/attR4X-PGKssPuro-UTF1-EGFP)  | TTTTCTCTAATCTTGTCTTCACGCTTTATTTTCATTAAGTTGATCTTCAATCTCTGATATCC<br>TTTTCTCTAATCTTGTCTTCACGCTTTATTTTCATTAAGTTG//CTGCTTTATTTTCATTAAGTTGATCTTCAATCTCTGATATCC   | chr12:2050403-2050423       | 984  | L1PA8A | Truncated              |
| HT1080 -31<br>(pTZ18R-attL4X/attR4X-PGKssPuro-UTF1-EGFP) | TTTCCTTGACATCTTGTCTTCACGCTTTATTTTCATTAAGTTGATCTTCAATCTCTGATATCC<br>TTTCCTTGACATCTTGTCTTCACGCTTTATTTTCATTAAGTTG//CTGCTTTATTTTCATTAAGTTGATCTTCAATCTCTGATATCC | chr4:142912896-142912916    | 5600 | L1PA7  | Full length non intact |
| HT1080-32<br>(pTZ18R-attL4X/attR4X-PGKssPuro-UTF1-EGFP)  | TTTTCTCTAATCTTGTCTTCACGCTTTATTTTCATTAAGTTGATCTTCAATCTCTGTTATCC<br>TTTTCTCTAATCTTGTCTTCACGCTTTATTTTCATTAAGTTG//CTGCTTTATTTTCATTAAGTTGATCTTCAATCTCTGTTATCC   | chr20:33750784-33750805(-)  | 2947 | L1PA7  | Truncated              |

\*According to L1Base (Database for *LINE-1* elements)



**Supplementary Table 6. Summary of Southern analysis results for the targeted clones in HT1080, HeLa, NEB-1 and hESC lines.**

| CLONES       | <i>attL</i> junction                  |                             | <i>attR</i> junction                |                             | Copy Number |
|--------------|---------------------------------------|-----------------------------|-------------------------------------|-----------------------------|-------------|
|              | Expected Fragment size (bp)           | Observed Fragment size (kb) | Expected Fragment size (bp)         | Observed Fragment size (kb) |             |
|              | <b>Restricted with <i>XbaI</i></b>    |                             | <b>Restricted with <i>PstI</i></b>  |                             |             |
| HT1080 #3    | 4421                                  | ~4.4                        | 4470                                | ~4.4                        | 2           |
| HT1080 #11   | 3787                                  | ~3.7                        | 4527                                | ~4.5                        | 2           |
| HT1080 #18   | 3490                                  | ~3.5                        | 4590                                | ~4.6                        | 1           |
| HT1080 #19   | 1758                                  | ~1.7                        | 4594                                | ~4.6                        | 1           |
| HT1080 #21   | 3760                                  | ~5.1                        | 4579                                | ~4.7                        | 1           |
|              |                                       |                             |                                     |                             |             |
| HeLa#H1- C26 | 7084                                  | ~7                          | 4376                                | ~4.3                        | 1           |
| HeLa# H1- C7 | 4108                                  | ~4                          | 4526                                | ~4.5                        | Multiple    |
| HeLa# H2-C1  | 8698                                  | ~8.7                        | 13659                               | > 10                        | 1           |
| HeLa# H2-C12 | 8698                                  | ~3.1                        | 13659                               | ~4                          | 1           |
| HeLa# H2-C15 | 3618                                  | ~2.1                        | 4596                                | ~4.9                        | 1           |
|              |                                       |                             |                                     |                             |             |
| NEB-1#N2-C3  | 6020                                  | ~6                          | 4645                                | ~4.6                        | 1           |
| NEB-1#N2-C11 | 3493                                  | ~3.5                        | 4500                                | ~4.5                        | 1           |
|              |                                       |                             |                                     |                             |             |
|              | <b>Restricted with <i>HindIII</i></b> |                             | <b>Restricted with <i>XbaI</i></b>  |                             |             |
| hESC#3       | 8779                                  | ~8.6                        | 6256                                | ~6.2                        | 1           |
| hESC#24      | 4996                                  | ~4.7                        | 6063                                | ~6.1                        | 1           |
| hESC#59      | 4480                                  | ~4.3                        | 15893                               | ~16                         | 1           |
|              |                                       |                             |                                     |                             |             |
|              | <b>Restricted with <i>NdeI</i></b>    |                             | <b>Restricted with <i>XbaI</i></b>  |                             |             |
| hESC-A3      | 10500                                 | ~8                          | 6600                                | ~10.5                       | 1           |
| hESC-E3      | 10500                                 | ~10.5                       | 7400                                | ~7.4                        | 1           |
| hESC-K3      | 10300                                 | ~5.8                        | 6100                                | ~5.7                        | 1           |
|              |                                       |                             |                                     |                             |             |
|              |                                       |                             | <b>Restricted with <i>BglII</i></b> |                             |             |
| HT1080-19    |                                       |                             | 6600                                | ~6.6                        | 1           |
| HT1080-26    |                                       |                             | 11000                               | ~7.5                        | 1           |
| HT1080-29    |                                       |                             | 15000                               | ~7                          | 1           |
| HT1080-31    |                                       |                             | 8800                                | ~6.3                        | 1           |
| HT1080-32    |                                       |                             | 17000                               | >15                         | 1           |

**Supplementary Table 7. Transcriptome analysis showing expression (log values) for upregulated genes (> log 2) and downregulated genes (< log2) along with their chromosomal location in the hESC clones (#3,#24, E3).**

**hESC #3 : Targeting at chrX: 43,585.650 – 43.585.670**

| Gene Name | Expression (Log value) | Chromosomal location          |
|-----------|------------------------|-------------------------------|
| CSAG1     | 4.1465                 | chrX:151,903,228-151,909,518  |
| MAGEA2B   | 3.1835                 | chrX:151,918,388-151,922,364  |
| SP140L    | 3.583                  | chr2:231,191,894-231,268,445  |
| MAGEA2    | 2.864                  | chrX:151,918,388-151,922,364  |
| CSAG3     | 2.534                  | chrX:151,923,679-151,928,738  |
| TRIM43B   | 2.4655                 | chr2:96,142,715-96,150,479    |
| DMD       | 3.072                  | chrX:32,382,699-32,383,325    |
| RPL10L    | 2.915                  | chr14:47,120,220-47,121,028   |
| DNER      | -2.322                 | chr2:230,312,032-230,451,615  |
| ZIC2      | -2.068                 | chr13:100,634,026-100,639,019 |
| HIST1H2BB | -2.5265                | chr6:26,184,023-26,184,404    |
| LOC729506 | -2.578                 | chr5:8,333,596-8,457,677      |
| ZNF257    | -3.5415                | chr19:22,235,266-22,273,903   |
| ZNF560    | -3.887                 | chr19:9,577,031-9,609,279     |
| ZNF492    | -3.789                 | chr19:22,817,126-22,850,472   |
| RWDD2B    | -3.0945                | chr21:30,378,080-30,391,685   |
| XIST      | -3.937                 | chrX:73,040,486-73,072,588    |
| CLC       | -4.4425                | chr19:40,221,893-40,228,669   |
| ZNF98     | -4.966                 | chr19:22,573,899-22,605,148   |
| ZNF676    | -5.843                 | chr19:22,361,903-22,379,753   |
| ZNF729    | -6.006                 | chr19:22,469,252-22,499,978   |
| HIST1H3C  | -6.1145                | chr6:26,045,639-26,046,097    |
| ZNF208    | -7.899                 | chr19:22,148,897-22,193,745   |

**hESC #24: Targeting at chr5:12.672.998 -12.673.018**

| Gene Name | Expression (Log value) | Chromosomal location       |
|-----------|------------------------|----------------------------|
| ZNF560    | -2.5195                | chr19:9,577,031-9,609,279  |
| XIST      | -4.236                 | chrX:73,040,486-73,072,588 |

### hESC E3: Targeting at chr1:213,884,581-213,884,602

| Gene Name | Expression (Log value) | Chromosomal location         |
|-----------|------------------------|------------------------------|
| PIK3API   | 3.494                  | chr10:98,353,069-98,480,279  |
| MAGEA2B   | 3.4025                 | chrX:151,918,388-151,922,364 |
| MAGEA2    | 3.4285                 | chrX:151,918,388-151,922,364 |
| CSAG1     | 3.3225                 | chrX:151,903,228-151,909,518 |
| CSAG3     | 3.5585                 | chrX:151,923,679-151,928,738 |
| PCDH10    | 3.2505                 | chr4:134,070,470-134,112,732 |
| KHDC3L    | 3.659                  | chr6:74,072,400-74,073,898   |
| NPPB      | 3.1175                 | chr1:11,917,521-11,918,992   |
| SFTA1P    | 2.8615                 | chr10:10,826,402-10,836,877  |
| S100A4    | 2.8155                 | chr1:153,516,095-153,518,282 |
| PLAT      | 2.646                  | chr8:42,032,236-42,065,194   |
| LOC339535 | 2.582                  | chr1:238,643,684-238,649,317 |
| CDKN2B    | 2.613                  | chr9:22,002,902-22,009,312   |
| SP140L    | 2.997                  | chr2:231,191,894-231,268,445 |
| MMP9      | 2.503                  | chr20:44,637,547-44,645,200  |
| HAPLN1    | 3.389                  | chr5:82,934,017-83,016,896   |
| MYOF      | 2.942                  | chr10:95,066,186-95,242,074  |
| COL5A1    | 3.0405                 | chr9:137,533,651-137,736,688 |
| SYTL5     | 2.6955                 | chrX:37,892,787-37,988,073   |
| TGFBI     | 2.9995                 | chr5:135,364,584-135,399,507 |
| CAPN2     | 2.2885                 | chr1:223,900,119-223,963,720 |
| CD46      | 2.212                  | chr1:207,925,383-207,968,861 |
| CXCL14    | 2.2885                 | chr5:134,906,371-134,914,969 |
| EBI3      | 2.209                  | chr19:4,229,540-4,237,524    |
| TGM2      | 2.477                  | chr20:36,756,864-36,793,700  |
| NDRG1     | 2.269                  | chr8:134,249,414-134,309,547 |
| COL3A1    | 2.823                  | chr2:189,839,099-189,877,472 |
| DPEP3     | 2.254                  | chr16:68,009,566-68,014,452  |
| ACTA1     | 2.1155                 | chr1:229,566,993-229,569,843 |
| FOXD1     | 2.5285                 | chr5:72,742,085-72,744,352   |
| WNK4      | 2.5205                 | chr17:40,932,649-40,949,084  |
| FRG1B     | 2.5545                 | chr20:29,624,035-29,653,908  |
| ANGPT1    | 2.0485                 | chr8:108,261,710-108,510,254 |
| ACTC1     | 2.2675                 | chr15:35,080,297-35,087,927  |
| ZNF99     | -2.3175                | chr19:22,934,985-22,966,973  |
| FAM107A   | 0.0745                 | chr3:58,549,845-58,563,491   |
| COMTD1    | -2.4025                | chr10:76,993,729-76,995,770  |
| LOC729506 | -3.2075                | chr5:8,333,596-8,457,677     |
| CAT       | -3.1955                | chr11:34,460,472-34,493,607  |
| ZNF560    | -3.4215                | chr19:9,577,031-9,609,279    |
| ZNF257    | -4.171                 | chr19:22,235,266-22,273,903  |
| XIST      | -4.566                 | chrX:73,040,486-73,072,588   |
| ZNF98     | -4.734                 | chr19:22,573,899-22,605,148  |
| ZNF676    | -5.019                 | chr19:22,361,903-22,379,753  |
| ZNF729    | -5.2215                | chr19:22,469,252-22,499,978  |
| ZNF208    | -5.9805                | chr19:22,148,897-22,193,745  |
